# Supplementary material
Source: MDPI journal article supplement (https://www.mdpi.com/2071-1050/10/8/2866)
Supplement: s1 [file s1]

### Natural disasters in the West Morava River valley - Questionnaire

*For the purpose of the scientific research "Natural disasters in the valley of the West Morava", please fill out the questionnaire by answering the following questions. The poll is anonymous. The results of the research will be used exclusively for scientific purposes.*

|                            |                                                               |
|----------------------------|---------------------------------------------------------------|
| <b>Sex</b>                 | <input type="checkbox"/> Male                                 |
|                            | <input type="checkbox"/> Female                               |
| <b>Age</b>                 | <input type="checkbox"/> Under 21                             |
|                            | <input type="checkbox"/> 21-30                                |
|                            | <input type="checkbox"/> 31-40                                |
|                            | <input type="checkbox"/> 41-50                                |
|                            | <input type="checkbox"/> 50-60                                |
|                            | <input type="checkbox"/> Above 61                             |
| <b>Respondent's origin</b> | <input type="checkbox"/> Born in the West Morava river valley |
|                            | <input type="checkbox"/> Settled in                           |
| <b>Place of living</b>     | <input type="checkbox"/> Urban settlement                     |
|                            | <input type="checkbox"/> Others                               |
| <b>Education</b>           | <input type="checkbox"/> Without education                    |
|                            | <input type="checkbox"/> Graduated from elementary school     |
|                            | <input type="checkbox"/> Graduated from high school           |
|                            | <input type="checkbox"/> Graduated from faculty               |

|                                                           |                                           |
|-----------------------------------------------------------|-------------------------------------------|
| <b>Occupation</b>                                         | <input type="checkbox"/> Farmer           |
|                                                           | <input type="checkbox"/> Employed         |
|                                                           | <input type="checkbox"/> Unemployed       |
|                                                           | <input type="checkbox"/> Pupil or student |
|                                                           | <input type="checkbox"/> Homemaker        |
|                                                           | <input type="checkbox"/> Retired          |
|                                                           | <input type="checkbox"/> Other            |
| <b>Experience with hazards</b>                            | <input type="checkbox"/> Yes              |
|                                                           | <input type="checkbox"/> No               |
| <b>The biggest threat to the West Morava river valley</b> | <input type="checkbox"/> Landslides       |
|                                                           | <input type="checkbox"/> Earthquakes      |
|                                                           | <input type="checkbox"/> Floods           |
|                                                           | <input type="checkbox"/> Hail             |
|                                                           | <input type="checkbox"/> Droughts         |
|                                                           | <input type="checkbox"/> Other            |

|                    |
|--------------------|
| <i>Instruction</i> |
|--------------------|

*Please respond to the offered positions by marking one of the numbers offered on the rating scale with the following meaning: 1 – I completely disagree, 2 - I partially disagree, 3 - Neither agree nor disagree (I'm not informed , I do not know, I do not have an opinion, and so on), 4 - I partially agree, 5 - I completely agree.*

**9. Ancestors talked about the floods in the West Morava River valley.**

1                      2                      3                      4                      5

**10. Ancestors talked about landslides in the West Morava River valley.**

1                      2                      3                      4                      5

**11. Ancestors talked about earthquakes in the West Morava River valley.**

1                      2                      3                      4                      5

**12. Ancestors talked about the hail in the West Morava River valley.**

1                      2                      3                      4                      5

**13. Ancestors talked about the drought in the West Morava River valley.**

1                      2                      3                      4                      5

**14. On the basis of ancestor stories, I was thinking about natural disasters before they hit Western Morava River valley.**

1                      2                      3                      4                      5

**15. Nature has an important impact on the characteristics of the life quality of the population.**

1                      2                      3                      4                      5

**16. The occupation of the population affects how they will relate (how much they will be interested) to natural disasters.**

1                      2                      3                      4                      5

**17. I think about how much my local environment is endangered by floods, landslides, earthquakes, hail or drought.**

1                      2                      3                      4                      5

**18. During floods or droughts, I pay more attention to the weather forecast.**

1                      2                      3                      4                      5

**19. After the flood, hail or drought, I continue to pay attention to the weather forecast.**

1                      2                      3                      4                      5

**20. Geographers are not sufficiently activated in the prevention and protection against natural disasters.**

1                      2                      3                      4                      5

**21. Geographers can help prevent the natural disasters.**

1                      2                      3                      4                      5

**22. Floods in the West Morava River valley can be prevented.**

1                      2                      3                      4                      5

**23. It's being worked on flood prevention.**

1                      2                      3                      4                      5

**24. Slides can be prevented.**

1                      2                      3                      4                      5

**25. It's being worked on landslides prevention.**

1                      2                      3                      4                      5

**26. Hail can be mitigated or prevented.**

1                      2                      3                      4                      5

**27. It's being worked on hail prevention.**

1                      2                      3                      4                      5

**28. Drought can be alleviated.**

1                      2                      3                      4                      5

**29. It's being worked on drought prevention.**

1                      2                      3                      4                      5

**30. I did not think about natural disasters until I experienced them.**

1                      2                      3                      4                      5

**31. Informing about disasters (characteristics, prevention, etc.) is most effective if implemented through:**

- ☐ Educational system
- ☐ Media (TV, radio, newspapers)
- ☐ Internet with accent on social networks
- ☐ Activation of geographers and similar professionals (seismologists, hydrogeologists, meteorologists) in the local environment

**32. When it comes to natural disasters, in the absence of a seismologist, I would advise the geographer.**

- ☐ Yes
- ☐ No

**33. When it comes to natural disasters, in the absence of a hydrogeologist, I would advise the geographer.**

- ☐ Yes
- ☐ No

**34. When it comes to natural disasters, in the absence of a meteorologist, I would advise the geographer.**

- ☐ Yes
- ☐ No

**35. Geographers, unlike other professionals, contemplate natural disasters in a complex way (both from a physical geographic point of view and in terms of monitoring the social geographic consequences).**

1                      2                      3                      4                      5

**36. Geographical content in the education system should be more dedicated to topics related to natural disasters.**

1                      2                      3                      4                      5

**37. Geography should be more present (more hours per week) in the educational system for practical reasons, such as, for example, prevention and protection against natural disasters.**

1                      2                      3                      4                      5

**38. Knowledge of geographers is not sufficiently exploited in society.**

1                      2                      3                      4                      5

**39. Natural disasters have affected the increase in interest in securing property.**

1                      2                      3                      4                      5

**40. Natural disasters have affected the price of real estate in vulnerable zones.**

1                      2                      3                      4                      5

**41. Natural disasters have affected the owners to decide for the sale of real estate in vulnerable zones.**

1                      2                      3                      4                      5

**42. Natural disasters have affected some of them permanently moving from the West Morava River valley.**

1                      2                      3                      4                      5

**43. Natural disasters affect the cost of living.**

1                      2                      3                      4                      5

**44. The state provided economic assistance endangered after natural disasters in the West Morava River valley.**

1                      2                      3                      4                      5

**45. Media only write about the consequences of natural disasters, while they rarely deal with prevention and protection.**

1                      2                      3                      4                      5

**46. Natural disasters have affected the quality of interpersonal relationships.**

1                      2                      3                      4                      5

*We sincerely thank you for your answers. Below you can leave a comment.*
